1 Outcomes of possible and probable rheumatic fever: a cohort study  
2 using northern Australian register data, 2013-2019

3

4 Laura Goddard<sup>1,2</sup>, Mirjam Kaestli<sup>1,3</sup>, Enes Makalic<sup>2</sup>, Anna P. Ralph<sup>1\*</sup>

5

6 1. Global and Tropical Health Division, Menzies School of Health Research, Charles  
7 Darwin University, Darwin, Northern Territory, Australia

8 2. School of Global and Population Health, University of Melbourne, Melbourne, Victoria,  
9 Australia

10 3. Research Institute for the Environment and Livelihoods, Charles Darwin University,  
11 Darwin, Northern Territory, Australia

12

13 \*Corresponding author

14 E-mail: [anna.ralph@menzies.edu.au](mailto:anna.ralph@menzies.edu.au)

## 15 Abstract

16 Background: Outcomes after acute rheumatic fever (ARF) diagnosis are variable, ranging from  
17 recovery to development of severe rheumatic heart disease (RHD). There is no diagnostic  
18 test. Evaluation using the Australian clinical diagnostic criteria can result in a diagnosis of  
19 'definite', 'probable' or 'possible' ARF. The 'possible' category was introduced in 2013 in  
20 Australia's Northern Territory (NT). Our aim was to compare longitudinal outcomes after a  
21 diagnosis of definite, probable or possible ARF.

22 Methods: We extracted data from the NT RHD register for Indigenous Australians with an  
23 initial diagnosis of ARF during the 5.5-year study period (01/01/2013 – 30/06/2019).  
24 Descriptive statistics were used to describe the demographic and clinical characteristics at  
25 initial ARF diagnosis. Kaplan-Meier curves were used to assess the probability of survival free  
26 of disease progression and the cumulative incidence risk at each year since initial diagnosis  
27 was calculated. Cox proportional hazards regression was used to determine whether time to  
28 disease progression differed according to ARF diagnosis and whether progression was  
29 associated with specific predictors at diagnosis. A multinomial logistic regression model was  
30 performed to assess whether ARF diagnosis was associated with RHD outcome and to assess  
31 associations between ARF diagnosis and clinical manifestations. A generalised linear mixed  
32 model (GLMM) was developed to assess any differences in the long-term antibiotic adherence  
33 between ARF diagnosis categories and to examine longitudinal trends in adherence.

34 Results: There were 913 initial ARF cases, 732 with normal baseline echocardiography. Of  
35 these, 92 (13%) experienced disease progression: definite ARF 61/348 (18%); probable ARF  
36 20/181 (11%); possible ARF 11/203 (5%). The proportion of ARF diagnoses that were  
37 uncertain (i.e. possible or probable) increased over time, from 22/78 (28%) in 2013 to 98/193  
38 (51%) in 2018. Cumulative incidence risk of any disease progression at 5.5 years was 33.6  
39 (23.6–46.2) for definite ARF, 13.5 (8.8–20.6) for probable and 11.4% (95% CI 6.0–21.3) for  
40 possible ARF. The probability of disease-free survival was lowest for definite ARF and highest

41 for possible ARF ( $p=0.004$ ). Cox proportional hazards regression indicated that disease  
42 progression was 2.19 times more likely in those with definite ARF than those with possible  
43 ARF ( $p=0.026$ ). Progression to RHD was reported in 37/348 (11%) definite ARF, 10/181 (6%)  
44 probable ARF, and 5/203 (2%) possible ARF. The multinomial logistic regression model  
45 demonstrated a significantly higher risk of progression from no RHD to RHD if the initial  
46 diagnosis was definite compared to possible ARF ( $p<0.001$  for both mild and moderate-severe  
47 RHD outcomes). The GLMM estimated that patients with definite ARF had a significantly  
48 higher adherence to antibiotic prophylaxis compared with probable ARF ( $p=0.024$ ).

49 Conclusion: These data indicate that the ARF diagnostic categories are being applied  
50 appropriately, are capturing more uncertain cases over time, provide a useful way to stratify  
51 risk and guide prognosis, and can help inform practice. Possible ARF is not entirely benign;  
52 some cases progress to RHD.

## 53 Introduction

54 In Australia, high burdens of acute rheumatic fever (ARF) and rheumatic heart disease (RHD)  
55 occur among Aboriginal and Torres Strait Islander peoples, particularly across northern and  
56 central Australia.(1) There is no diagnostic test for ARF. This impairs case detection and  
57 opportunities for early intervention with antibiotic secondary prophylaxis.(2) The Jones Criteria  
58 are syndromic criteria to diagnose ARF, dividing the clinical features into major and minor  
59 manifestations based on their prevalence and specificity.(3) The Jones Criteria have been  
60 regularly revised in response to evolving clinical knowledge and epidemiology, to reduce  
61 overdiagnosis in high-resource settings where ARF has become uncommon.(4-6) As a result,  
62 they became less sensitive for detection of cases in high-incidence populations. Different  
63 considerations were therefore added for high-risk groups (3, 5, 6), but to further avoid missed  
64 diagnoses in high-prevalence Aboriginal communities in Australia, additional diagnostic  
65 categories of 'possible' and 'probable' ARF were proposed.(7) This proposal was adopted and  
66 since 2013, diagnoses in Australia have been grouped as: possible ARF, probable ARF,  
67 definite ARF, and RHD. The distinction between probable and possible is subjective and  
68 requires thoughtful clinical decision making. These categories were further clarified in the  
69 revised 2020 Australian Guidelines (Box 1).(3) This is in contrast to international guidelines  
70 that only articulate two categories: definite and probable ARF.(6)

71

### 72 **Box 1: Acute rheumatic fever diagnostic categories, 2020 Australian Guidelines (6)**

**Definite ARF:** acute presentation which fulfils the 2015 Revised Jones diagnostic criteria for ARF.

**Probable ARF:** acute presentation which does not fulfil Jones diagnostic criteria for ARF, missing one major or one minor criterion or lacking evidence of preceding streptococcal infection, but ARF is still considered the most likely diagnosis.

**Possible ARF:** acute presentation which does not fulfil Jones diagnostic criteria for ARF, missing one major or one minor criterion or lacking evidence of preceding streptococcal infection, and ARF is considered uncertain but cannot be ruled out.

73

74 Previous research has described progression from ARF to RHD and other outcomes such as  
75 morbidity and mortality rates.(8, 9) In Australia's Northern Territory (NT), the risk of  
76 progression from definite ARF to RHD is high, with a cumulative incidence of progression of  
77 27.1% at 1 year after diagnosis, 44.0% at 5 years and 51.9% at 10 years.(9) Adherence to  
78 penicillin to prevent rheumatic fever recurrences reduces risk, with a dose-dependent  
79 effect.(10) Previous studies routinely exclude possible ARF and often also exclude probable  
80 ARF cases, so long-term outcomes of these diagnoses remain unknown.

81

82 To provide patients with better prognostic information, determine whether clinicians appear to  
83 be applying diagnostic categories appropriately, and reflect on whether current management  
84 guidelines (3) are appropriate, the aim of this study is to describe patient outcomes after a  
85 diagnosis of possible or probable (collectively, 'uncertain') ARF, compared with definite ARF.  
86 Further aims are to determine whether uncertain diagnoses differ from definite ARF in  
87 demographic or clinical characteristics, severity of RHD if there is progression to RHD, and  
88 penicillin adherence over time.

89

## 90 **Methods**

### 91 **Study design and data sources**

92 We used a retrospective cohort design and Cox proportional hazards regression to analyse  
93 the probability of disease progression after an initial diagnosis of ARF. Sub-analyses on initial  
94 ARF diagnoses with RHD outcome and adherence to penicillin adherence were conducted

95 using multinomial logistic regression and generalised linear mixed-effects models (GLMM)  
96 respectively. Data were extracted from the NT RHD Register (the Register) for a 5.5-year  
97 period (01/01/2013 – 30/06/2019). The Register was established in 1997 as a tool to support  
98 and coordinate care. Since then, all notified cases of ARF (including recurrent episodes) and  
99 RHD in the NT have been recorded, capturing approximately 3,500 individuals at the time of  
100 data extraction. The Register includes data on patient demographics, clinical features of ARF  
101 and RHD, medical appointments and secondary penicillin prophylaxis, which is generally  
102 required long-term after probable and definite ARF, and short term (12 months) after possible  
103 ARF. Mortality data from the NT Births, Deaths and Marriages database are reviewed monthly  
104 and integrated with the Register.

105

## 106 Study population and sample

107 The study population was defined as Indigenous Australians residing in the NT, which is  
108 approximately 74,546 or 30% of the total NT population.(11, 12) The Register contained  
109 information on 1,140 individuals with 1,567 diagnoses during the study period. Indigenous  
110 Australians residing in the NT who were registered with an initial diagnosis of possible,  
111 probable or definite ARF on the Register during the study period were included. Exclusions  
112 comprised non-Indigenous people (11; 1%); cases whose first documented ARF episode was  
113 labelled a recurrence (216; 19%); and concurrent ARF and RHD diagnoses (180; 16%). Those  
114 whose first documented episode was labelled a recurrence were assumed to have had a  
115 previous diagnosis of ARF before the study period began or in a different jurisdiction. One  
116 case whose initial diagnosis date was on the final day of the study period was excluded from  
117 the disease progression analyses due to a survival time of zero. Concurrent ARF and RHD  
118 diagnoses (180 cases) were similarly excluded from disease progression analyses since they  
119 had a disease-free survival time of zero. These cases represent severe ARF which has  
120 already progressed to RHD at the time of first echocardiogram, or ARF occurring in someone

121 with previously unrecognised latent RHD, or documentation of rheumatic carditis in the register  
122 as RHD (since distinguishing rheumatic carditis from established RHD is not always possible,  
123 and misclassification may occur during clinical reporting or data entry). The exclusions mean  
124 that the most severe form of ARF (definite ARF with carditis classified as RHD, or carditis  
125 complicating RHD), were excluded from the Cox regressions but were still accounted for in  
126 the multinomial model. The final sample size for the Cox regression was 732 cases and 913  
127 cases for the multinomial model.

128

## 129 Outcomes

130 The main outcome of interest was time to disease progression. Disease progression was  
131 defined as progression from possible to probable ARF, definite ARF or RHD; probable to  
132 definite ARF or RHD; or definite ARF to definite ARF recurrence or RHD at any time during  
133 the study period (Table 1). Individuals could progress and regress more than once during the  
134 study period, however only the first progression was counted.

135

136 **Table 1. Definitions of disease progression**

| Initial ARF diagnosis | Subsequent diagnosis              |
|-----------------------|-----------------------------------|
| ARF possible          | ARF probable, ARF definite or RHD |
| ARF probable          | ARF definite or RHD               |
| ARF definite          | ARF definite recurrence or RHD    |

137

138 We also calculated the proportion of those without baseline carditis who progressed to RHD  
139 and the risk to develop mild or moderate to severe RHD compared to no RHD based on initial  
140 ARF diagnosis.

141

142 Adherence to secondary prophylaxis with benzathine benzylpenicillin (BPG) was calculated  
143 as the percentage of received doses / prescribed doses x100. BPG is usually required once  
144 every 28 days for ARF secondary prophylaxis, i.e. 13 doses per year, but may be prescribed  
145 every 21 days, i.e. 17 doses per year, in more severe or breakthrough cases. The number of

146 prescribed doses was estimated by dividing the number of days that BPG was prescribed (last  
147 dose date minus first dose date) divided by 21 or 28 for 3-weekly and 4-weekly BPG  
148 respectively. Adherence calculations were restricted to cases that had been prescribed at least  
149 6 doses of BPG (equivalent to 168 days for a 4-weekly regimen). Adherence was considered  
150 good if  $\geq 80\%$  of injections were received.

151

## 152 Predictors

153 Predictors used in the analyses included initial ARF diagnosis, sex, age group, clinical  
154 manifestations, and adherence to secondary prophylaxis. Initial ARF diagnosis was defined  
155 as the first diagnosis of possible, probable or definite ARF on the Register. Sex was classified  
156 as per the NT RHD register (male, female, unknown). Age at initial diagnosis was grouped as  
157 0-4, 5-14, 15-24,  $\geq 25$  years; these have different risk profiles for ARF and RHD.(3) Clinical  
158 manifestations were grouped as major manifestations (carditis; arthritis or 'joint'; Sydenham's  
159 Chorea; and subcutaneous nodules and erythema marginatum or 'skin'), minor manifestations  
160 (fever; elevated ESR or CRP; prolonged P-R interval on ECG), and evidence of Group A  
161 streptococcal infection (elevated serological titre or cultured from throat swab) as per the  
162 RHD Australia Clinical Guidelines.(3) The definition of adherence is described in the outcomes  
163 section. Individuals who had missing data for adherence are excluded from analyses as these  
164 data are unlikely to be missing at random and keeping these individuals in the analysis may  
165 therefore introduce bias.

166

## 167 Statistical analysis

168 Descriptive statistics were used to describe the demographic and clinical characteristics at  
169 initial ARF diagnosis (possible, probable, definite). Kaplan-Meier curves and log rank test were  
170 used to assess the probability of survival free of disease progression and the cumulative  
171 incidence risk at each year since initial diagnosis was calculated. Cox proportional hazards



172 regression was used to determine whether time to disease progression differed according to  
173 ARF diagnosis category (definite, probable, possible), and whether it was predicted by age  
174 group at diagnosis, sex, adherence to secondary prophylaxis or clinical manifestations (joint  
175 manifestation-only and joint manifestation with carditis and/or chorea) at diagnosis. Hazard  
176 ratios, 95% CI and p-values are reported.

177

178 A multinomial logistic regression model was performed to assess whether ARF diagnosis type  
179 (definite, probable, possible) was associated with RHD outcome (no RHD, mild RHD  
180 moderate-severe RHD). Moderate and severe RHD were combined to increase observations  
181 per group level. Predictors included age group, sex, drug adherence and clinical  
182 manifestations (carditis-only or joint manifestations-only. Chorea-only was excluded due to  
183 the small number of observations). Multinomial logistic regression was also used to assess  
184 associations between clinical manifestations (Jones major criteria) and ARF diagnosis.  
185 Relative risk ratios, 95% confidence intervals (CI) and p-values were calculated for clinical  
186 manifestations, age at diagnosis and sex, using definite ARF as the reference group.

187

188 A GLMM (beta regression family) was developed to assess any differences in the long-term  
189 antibiotic adherence between ARF diagnosis categories and examine longitudinal trends in  
190 adherence (glmmTMB package in R). This took into account the number of years receiving  
191 BPG prophylaxis and a random intercept for patient identification. Model residuals were  
192 checked for lack of patterns across fitted values and predictors (DHARMA package) and no  
193 temporal autocorrelation.

194

195 Data were analysed using STATA version 15.1 (STATA Corp, College Station, TX), R (v4.1.3;  
196 R Project for Statistical Computing, Vienna, Austria) and Microsoft Excel (2016).

197

## 198 Ethics approval

199 Study approval was granted by the Human Research Ethics Committee of the Northern  
 200 Territory Department of Health and Menzies School of Health Research (2019-3482). This  
 201 approval was registered with the University of Melbourne's Medicine and Dentistry Human  
 202 Ethics Sub-Committee (1955194). Access to register data was approved by the data  
 203 custodian, Top End Health Service, NT Department of Health.

204

## 205 Results

### 206 Demographic and clinical characteristics

207 During the study period there were 913 initial diagnoses of ARF among eligible register  
 208 participants: 509 (56%) definite, 196 (21%) probable and 208 (23%) possible ARF. All ARF  
 209 types were more common among females than males and in those aged 5-14 years compared  
 210 with other age groups (**Error! Reference source not found.**).

211

212 Table 2. Characteristics at initial acute rheumatic fever diagnosis among Indigenous  
 213 Australians, NT, 2013-2019

| Characteristic    | ARF      |       |          |       |          |       | Total |       |
|-------------------|----------|-------|----------|-------|----------|-------|-------|-------|
|                   | Possible |       | Probable |       | Definite |       | n     | (%)   |
|                   | n        | (%)   | n        | (%)   | n        | (%)   |       |       |
| Cases             | 208      | (100) | 196      | (100) | 509      | (100) | 913   | (100) |
| Sex               |          |       |          |       |          |       |       |       |
| Male              | 97       | (47)  | 87       | (44)  | 243      | (48)  | 427   | (47)  |
| Female            | 111      | (53)  | 109      | (56)  | 266      | (52)  | 486   | (53)  |
| Age group (years) |          |       |          |       |          |       |       |       |
| 0-4               | 25       | (12)  | 11       | (6)   | 27       | (5)   | 63    | (7)   |
| 5-14              | 113      | (54)  | 92       | (47)  | 298      | (59)  | 503   | (55)  |
| 15-24             | 37       | (18)  | 53       | (27)  | 107      | (21)  | 197   | (22)  |
| ≥25               | 33       | (16)  | 40       | (20)  | 77       | (15)  | 150   | (16)  |
| Median, IQR       | 10       | 6-19  | 14       | 9-22  | 12       | 9-18  | 15    | 8-19  |
| Year of diagnosis |          |       |          |       |          |       |       |       |
| 2013              | 9        | (4)   | 13       | (7)   | 56       | (11)  | 78    | (9)   |
| 2014              | 13       | (6)   | 11       | (6)   | 72       | (14)  | 96    | (11)  |
| 2015              | 18       | (9)   | 28       | (14)  | 77       | (15)  | 123   | (13)  |
| 2016              | 40       | (19)  | 36       | (18)  | 81       | (16)  | 157   | (17)  |

|                                |     |      |     |      |     |      |     |      |
|--------------------------------|-----|------|-----|------|-----|------|-----|------|
| 2017                           | 38  | (18) | 52  | (27) | 87  | (17) | 177 | (19) |
| 2018                           | 58  | (28) | 40  | (20) | 95  | (19) | 193 | (21) |
| 2019*                          | 32  | (15) | 16  | (8)  | 41  | (8)  | 89  | (10) |
| Adherence (%)                  |     |      |     |      |     |      |     |      |
| <50                            | 16  | (7)  | 22  | (11) | 52  | (10) | 90  | (10) |
| 50-79                          | 47  | (23) | 57  | (29) | 120 | (24) | 224 | (24) |
| 80-99                          | 47  | (23) | 55  | (28) | 164 | (32) | 266 | (29) |
| ≥100                           | 36  | (17) | 36  | (19) | 109 | (21) | 181 | (20) |
| Unknown †                      | 62  | (30) | 26  | (13) | 64  | (13) | 152 | (17) |
| Clinical manifestation ‡       |     |      |     |      |     |      |     |      |
| Major                          |     |      |     |      |     |      |     |      |
| Carditis                       | 6   | (3)  | 14  | (7)  | 167 | (33) | 187 | (20) |
| Joint                          | 172 | (83) | 182 | (93) | 433 | (85) | 787 | (86) |
| Sydenham chorea                | 3   | (1)  | 0   | (0)  | 62  | (12) | 65  | (7)  |
| Skin                           | 2   | (1)  | 1   | (1)  | 7   | (1)  | 10  | (1)  |
| Minor                          |     |      |     |      |     |      |     |      |
| Fever                          | 51  | (24) | 60  | (31) | 340 | (67) | 451 | (49) |
| Elevated ESR or CRP            | 12  | (14) | 9   | (6)  | 11  | (2)  | 32  | (5)  |
| Prolonged P-R interval on ECG  | 10  | (5)  | 19  | (10) | 196 | (39) | 225 | (25) |
| Other                          |     |      |     |      |     |      |     |      |
| Elevated GAS serological titre | 183 | (88) | 168 | (86) | 480 | (94) | 831 | (91) |
| GAS cultured from throat swab  | 5   | (2)  | 7   | (4)  | 18  | (4)  | 30  | (3)  |
| Not recorded                   | 6   | (3)  | 1   | (1)  | 0   | (0)  | 7   | (1)  |

214 ARF = acute rheumatic fever; GAS = group A beta haemolytic streptococcus; ESR =  
215 erythrocyte sedimentation rate; CRP = C-reactive protein; ECG = electrocardiogram; CM =  
216 clinical manifestation

217 \* Note: only 6 months of data

218 † Note: includes those where prophylaxis data is not recorded and where prophylaxis was  
219 prescribed for <6 months.

220 ‡ Note: cases may have more than one clinical manifestation, therefore the total does not  
221 add up to 100%

222 ¥ Note: Elevated GAS serological titre or GAS cultured from throat swab only

223

224 Joint pain was the most common major Jones criterion for all ARF diagnostic categories.

225 Evidence of streptococcal infection (considered essential) was missing in 2% of cases

226 classified as definite ARF, and in approximately 10% of possible and probable ARF cases.

227 There were 2 deaths during the study period. The proportion of those adhering to penicillin

228 secondary prophylaxis was similar for possible and probable ARF but higher for definite ARF

229 (Table 2): the proportion receiving  $\geq 80\%$  of scheduled BPG injections was 37% and 46%  
230 among possible and probable cases respectively, compared with 56% among definite ARF  
231 cases. However, the proportion of possible ARF cases with unknown adherence was double  
232 that among probable ARF and definite ARF cases (**Error! Reference source not found.**).  
233 Each year, the number of ARF diagnoses increased (Fig 1).

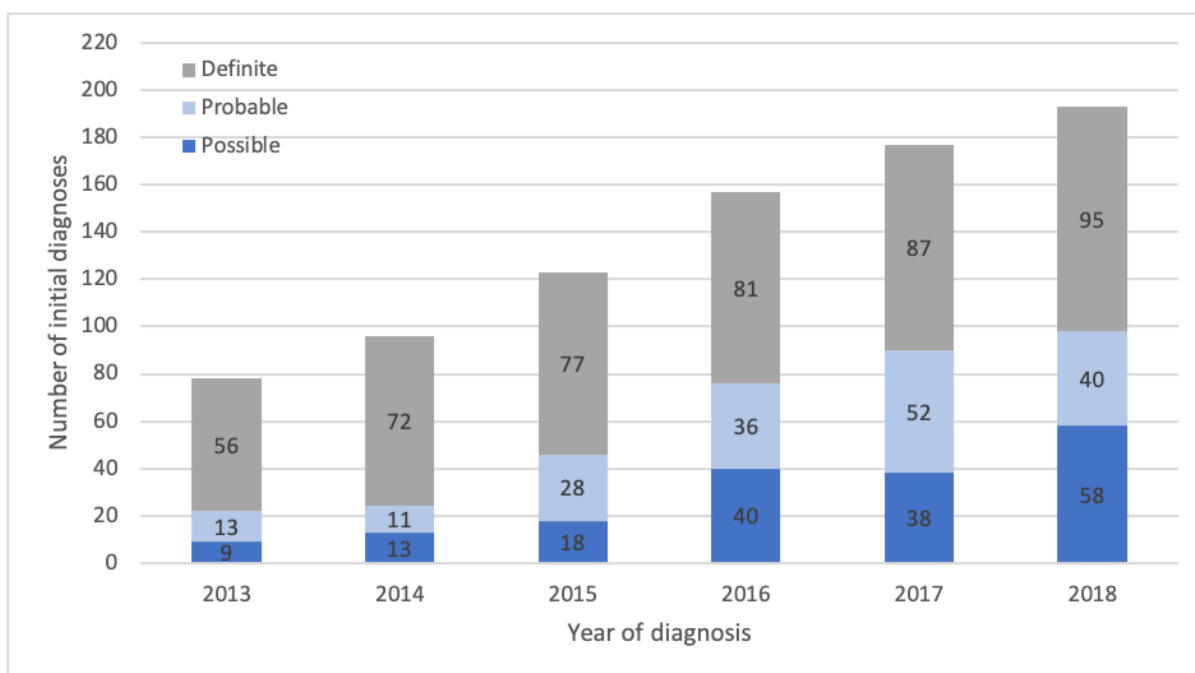

234  
235 **Fig 1: Number of ARF diagnoses among Indigenous Australians, Northern Territory,**  
236 **2013-2018. ARF indicates acute rheumatic fever.**  
237

238 The proportion that was uncertain increased from 22/78 (28%) in 2013 when these diagnostic  
239 categories started to be recorded, to 98/193 (51%) in 2018 (**Error! Reference source not**  
240 **found.**).

241

## 242 Disease progression

243 After excluding cases with zero disease-free survival time, a total of 92 (13%) cases  
244 experienced disease progression during the study period. Of those with an initial diagnosis of  
245 definite ARF, 61/348 (18%) experienced disease progression, compared to 20/181 (11%) with  
246 probable ARF and 11/203 (5%) with possible ARF. Of those who progressed, 37/61 (61%)

247 with definite ARF, 10/20 (50%) with probable ARF, and 5/11 (45%) with possible ARF (total of  
248 52/92 or 57%) were diagnosed with RHD during the study period. Overall, progression to RHD  
249 was reported in 37/348 (11%) definite ARF, 10/181 (6%) probable ARF, and 5/203 (2%)  
250 possible ARF.

251

252 Possible ARF had the best probability of survival free of disease progression and definite ARF  
253 had the worst survival probability ( $p=0.0043$ ; log rank test; Fig 2).

254

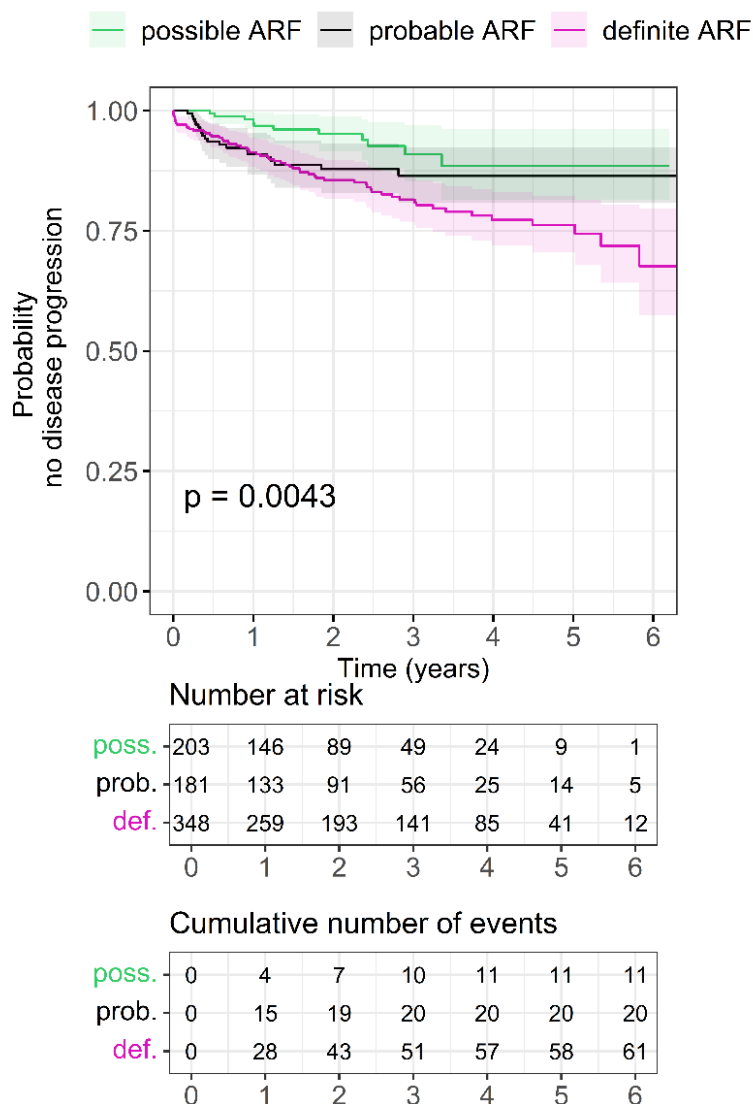

255

256 **Fig 2: Kaplan-Meier progression-free survival estimates by initial ARF diagnosis among**  
257 **Indigenous Australians, Northern Territory, 2013-2019.** ARF = acute rheumatic fever.

258

259 For possible and probable ARF, the risk of disease progression continued to increase each  
260 year up to 4 years and 3 years since initial diagnosis respectively. For definite ARF, the risk  
261 of disease progression continued to increase each year of the follow-up period (Table 3).

262

263 **Table 3: Cumulative incidence risk of disease progression by year of follow-up among**  
264 **Indigenous Australians, Northern Territory, 2013-2019**

| Year | Possible ARF<br>%, CI (95%) | Probable ARF<br>%, CI (95%) | Definite ARF<br>%, CI (95%) |
|------|-----------------------------|-----------------------------|-----------------------------|
| 1    | 2.46 (0.93 – 6.44)          | 9.03 (5.54 – 14.55)         | 8.66 (6.05 – 12.32)         |
| 2    | 4.85 (2.31 – 10.03)         | 12.13 (7.87 – 18.45)        | 14.43 (10.87 – 19.02)       |
| 3    | 9.05 (4.72 – 17.00)         | 13.54 (8.78 – 20.59)        | 17.98 (13.83 – 23.19)       |
| 4    | 11.44 (5.97 – 21.33)        | 13.54 (8.78 – 20.59)        | 22.19 (17.22 – 28.33)       |
| 5    | 11.44 (5.97 – 21.33)        | 13.54 (8.78 – 20.59)        | 23.26 (18.01 – 29.73)       |
| 5.5* | 11.44 (5.97 – 21.33)        | 13.54 (8.78 – 20.59)        | 33.55 (23.61 – 46.21)       |

265 \*Only six months of data are available for the final year

266

267 Cox proportional hazards regression indicated that disease progression was 2.19 times more  
268 likely in those with definite ARF than those with possible ARF (p=0.026) (Table 4).

269  
270

**Table 4. Cox proportional hazards analysis of predictors associated with disease progression among Indigenous Australians, Northern Territory, 2013-2019**

| Variable                                                   | Hazard Ratio | Confidence Interval (95%) | P value |
|------------------------------------------------------------|--------------|---------------------------|---------|
| <b>ARF Diagnosis</b>                                       |              |                           |         |
| Possible ARF                                               | Ref          |                           |         |
| Probable ARF                                               | 1.44         | 0.66 – 3.15               | 0.353   |
| Definite ARF                                               | 2.19         | 1.10 – 4.34               | 0.026   |
| <b>Sex</b>                                                 |              |                           |         |
| Male                                                       | Ref          |                           |         |
| Female                                                     | 1.06         | 0.67 – 1.67               | 0.811   |
| <b>Age group (years)</b>                                   |              |                           |         |
| 0-4                                                        | 0.73         | 0.26 – 2.06               | 0.552   |
| 5-14                                                       | Ref          |                           |         |
| 15-24                                                      | 1.28         | 0.75 – 2.20               | 0.366   |
| ≥25                                                        | 1.71         | 0.93 – 3.15               | 0.084   |
| <b>Adherence</b>                                           |              |                           |         |
| <50%                                                       | 0.31         | 0.09 – 1.11               | 0.072   |
| 50-79%                                                     | 1.48         | 0.66 – 3.29               | 0.337   |
| 80-99%                                                     | Ref          |                           |         |
| ≥100%                                                      | 2.22         | 0.86 – 5.78               | 0.100   |
| <b>Clinical manifestations</b>                             |              |                           |         |
| Carditis and/or chorea with or without joint manifestation | Ref          |                           |         |
| Joint manifestation only (i.e. no carditis, no chorea)     | 0.48         | 0.24 – 0.95               | 0.035   |

271  
272

ARF = acute rheumatic fever  
Note:

273  
274  
275  
276

1. Sample size for this analysis is 595 cases (137 cases missing drug adherence data and 181 cases with zero survival time were excluded)  
2. Proportional hazard assumptions were not met for drug adherence nor joint manifestation and therefore, an interaction term with linear time was fitted for these 2 factors (likelihood ratio test  $\text{Chi}^2(3) = 14.9$ ;  $\text{Chi}^2(1) = 7.4$ ,  $P < 0.01$  for both). The time varying effect for joint manifestation was 1.7 ( $P = 0.012$ ) and 2.0 for prophylaxis adherence of <50% ( $P = 0.010$ ), both indicating a weakening protective effect with time.

277 The analysis also indicated that having joint manifestations only with no carditis nor chorea at  
 278 initial diagnosis of ARF was protective, with this group being 52% less likely to experience  
 279 disease progression compared with those who had other clinical manifestations including  
 280 carditis and/or chorea at initial diagnosis and with or without joint manifestation ( $p=0.035$ )  
 281 (Table 4). Disease progression was equally likely between sexes and age groups. In this  
 282 dataset, the association between penicillin adherence and progression was counterintuitive  
 283 and not statistically significant. People who had higher adherence were those who had disease  
 284 progression (Table 4).

285

## 286 Risk of developing rheumatic heart disease

287 The proportion of those who had no baseline carditis but still progressed to RHD is presented  
 288 by clinical manifestation (joint-only or chorea-only) in Table 5. Of those who progressed to  
 289 RHD with joint-only manifestations, 46% (17/37) progressed after one year. Of those who  
 290 progressed to RHD with chorea-only manifestations, only 3% (1/30) progressed after one year.  
 291 An additional case with neither chorea nor joint manifestations also progressed to RHD after  
 292 one year, bringing the total cases with progression to RHD after one year to be 19 cases.

293

294 **Table 5: Progression to RHD by clinical manifestation among Indigenous Australians,**  
 295 **Northern Territory, 2013-2019**

| ARF diagnosis   | Joint-only with no baseline echocardiographic pathology |                          | Chorea-only with no baseline echocardiographic pathology |                          |
|-----------------|---------------------------------------------------------|--------------------------|----------------------------------------------------------|--------------------------|
|                 | Total cases N                                           | Progression to RHD n (%) | Total cases N                                            | Progression to RHD n (%) |
| Possible ARF    | 167                                                     | 4 (2%)                   | 2                                                        | 0 (0%)                   |
| Probable ARF    | 164                                                     | 10 (6%)                  | 0                                                        | -                        |
| Definite ARF    | 229                                                     | 23 (10%)                 | 28                                                       | 3 (11%)                  |
| All ARF / total | 560                                                     | 37 (7%)                  | 30                                                       | 3 (10%)                  |

296 ARF = acute rheumatic fever

297 Note: 181 cases with zero survival time were excluded from this analysis



298 The multinomial logistic regression model demonstrated a significantly higher risk of  
299 progression from no RHD to RHD if the initial diagnosis was definite compared to possible  
300 ARF ( $p < 0.001$  for both mild and moderate-severe RHD outcomes) (Table 6).

301  
302

**Table 6: Multinomial logistic regression of initial ARF diagnosis and development of RHD, by RHD severity, among Indigenous Australians, Northern Territory, 2013-2019**

| Multinomial model                                                                        | Relative Risk Ratio | Confidence Interval (95%) | P value     |
|------------------------------------------------------------------------------------------|---------------------|---------------------------|-------------|
| Risk to develop mild RHD compared to no RHD after an initial ARF diagnosis               |                     |                           |             |
| <b>ARF diagnosis</b>                                                                     |                     |                           |             |
| ARF possible                                                                             | Ref                 |                           |             |
| ARF probable                                                                             | 2.27                | 0.91-5.64                 | 0.078       |
| ARF definite                                                                             | 6.39                | 2.85-14.35                | < 0.001 *** |
| <b>Age group</b>                                                                         |                     |                           |             |
| <= 4 yrs                                                                                 | 0.29                | 0.07-1.26                 | 0.098       |
| 5-14 yrs                                                                                 | Ref                 |                           |             |
| 15-24 yrs                                                                                | 1.71                | 1.04-2.81                 | 0.034 *     |
| >=25 yrs                                                                                 | 1.98                | 1.11-3.54                 | 0.021 *     |
| <b>Clinical Manifestations</b>                                                           |                     |                           |             |
| Carditis only – Yes                                                                      | 0.95                | 0.27-3.32                 | 0.939       |
| Joint only – Yes                                                                         | 0.49                | 0.32-0.76                 | 0.002 **    |
| <b>Adherence</b>                                                                         |                     |                           |             |
| <50%                                                                                     | 0.49                | 0.24-1.01                 | 0.054       |
| 50-79%                                                                                   | 0.77                | 0.47-1.26                 | 0.294       |
| 80-99%                                                                                   | Ref                 |                           | 0.591       |
| ≥100%                                                                                    | 0.86                | 0.50-1.48                 |             |
| <b>Gender – Female</b>                                                                   |                     |                           | 0.084       |
| Risk to develop moderate to severe RHD compared to no RHD after an initial ARF diagnosis |                     |                           |             |
| <b>ARF diagnosis</b>                                                                     |                     |                           |             |
| ARF possible                                                                             | Ref                 |                           |             |
| ARF probable                                                                             | 2.51                | 0.46-13.72                | 0.289       |
| ARF definite                                                                             | 13.92               | 3.22-60.16                | <0.001***   |
| <b>Age group</b>                                                                         |                     |                           |             |
| <= 4 yrs                                                                                 | 1.80                | 0.64-5.04                 | 0.261       |
| 5-14 yrs                                                                                 | Ref                 |                           |             |
| 15-24 yrs                                                                                | 1.88                | 0.98-3.61                 | 0.059       |
| >=25 yrs                                                                                 | 2.11                | 0.94-4.72                 | 0.071       |
| <b>Clinical Manifestations</b>                                                           |                     |                           |             |

|                        |      |           |           |
|------------------------|------|-----------|-----------|
| Carditis only – Yes    | 3.14 | 1.11-8.82 | 0.030*    |
| Joint only – Yes       | 0.19 | 0.11-0.34 | <0.001*** |
| <b>Drug adherence</b>  |      |           |           |
| <50%                   | 0.20 | 0.06-0.74 | 0.015*    |
| 50-79%                 | 0.67 | 0.34-1.31 | 0.237     |
| 80-99%                 | Ref  |           |           |
| ≥100%                  | 1.41 | 0.75-2.66 | 0.281     |
| <b>Gender – Female</b> | 0.90 | 0.52-1.55 | 0.710     |

303 ARF = acute rheumatic fever; ESR = erythrocyte sedimentation rate; CRP = C-reactive protein; ECG = electrocardiograph; GAS = Group A  
304 Streptococcus; \*\*\* P<0.001; \*\* P<0.010; \* P<0.050  
305 Note: sample size for this analysis is 761 cases (151 cases missing drug adherence data were excluded)

306 There was a strong protective effect for those with joint manifestations only, with a 51%  
307 reduced risk to progress to mild RHD and an 81% reduced risk to progress to moderate or  
308 severe RHD from no RHD, with all other covariates held constant ( $p < 0.001$  for both; Table 6).  
309 There was a three-fold increased risk of developing moderate-severe RHD compared to no  
310 RHD for patients with carditis-only clinical manifestation ( $p = 0.030$ ).

311

### 312 Penicillin adherence

313 The GLMM estimated that patients with definite ARF had a significantly higher adherence to  
314 antibiotic prophylaxis compared with probable ARF ( $p = 0.024$ ). Possible ARF, requiring only  
315 12 months of treatment, was excluded from adherence comparisons. Time on prophylaxis was  
316 also significantly inversely associated with adherence, with adherence being higher in the first  
317 year after diagnosis and falling in years 2 to 6 after ARF diagnosis, for both definite and  
318 probable ARF ( $p < 0.001$  for all) (Fig 3).

319

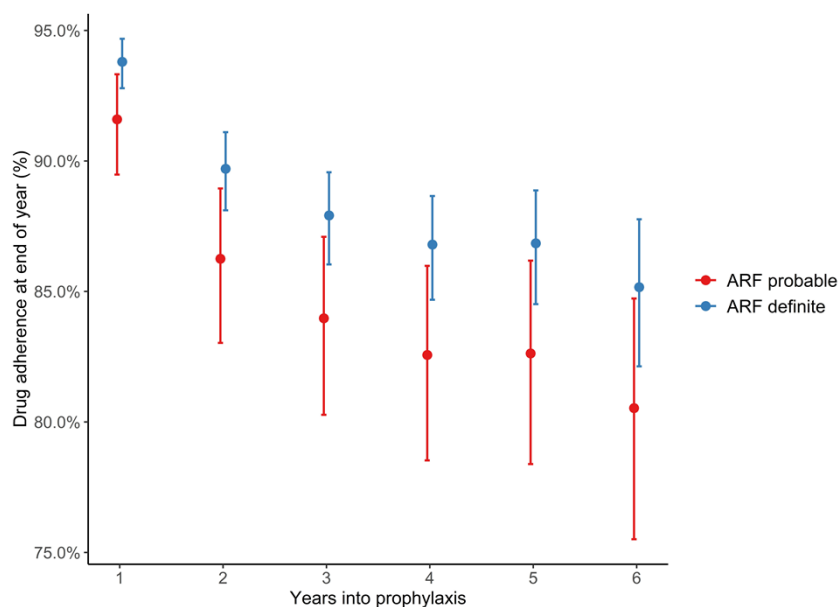

320

321 **Fig 3: Drug adherence by initial ARF diagnosis and year since diagnosis among**  
322 **Indigenous Australians, Northern Territory, 2013-2019.**

323 ARF = acute rheumatic fever.

324

## 325 Discussion

326 To our knowledge, this is the first time that outcomes of possible and probable ARF have been  
327 determined. We show that since introduction of these diagnostic categories, they now make  
328 up over 40% of all initial ARF diagnoses in the Australian jurisdiction with the highest ARF  
329 burden. The diagnostic categories appear to be well applied by clinicians: the vast majority of  
330 children and young people diagnosed with possible ARF (95%) and probable ARF (89%) did  
331 not progress to definite ARF or RHD. These data are reassuring both for clinicians about the  
332 appropriate application of these diagnostic categories, and for patients and their families about  
333 the likelihood of a good outcome. However, the fact that some patients do progress  
334 emphasises that the Revised Jones criteria can still be inadequately sensitive in a high-burden  
335 environment, and the categories of ‘possible’ and ‘probable’ ARF add value by capturing some  
336 true cases who require institution of secondary prevention and appropriate clinical follow up.

337  
338 Our findings highlight that definite, probable and possible ARF represent three distinct  
339 diagnostic categories with different prognoses. In a high-incidence setting, including the  
340 category of ‘possible’ ARF captures an important patient group who might otherwise receive  
341 an alternative generic diagnosis such as ‘viral illness’ or ‘musculoskeletal pain’. International  
342 guidelines currently only articulate two categories: definite and probable ARF.(6) While many  
343 people labelled with possible ARF in our dataset may never have had true ARF, is not entirely  
344 benign; 4/200 (2%) with an initial diagnosis of possible ARF and a normal echocardiogram  
345 developed RHD; 3 within 12 months (1.5%), and 1 within 24 months (0.5%). The inability to  
346 predict which individuals are the ones most likely to progress highlights the need for  
347 biomarkers to diagnose and risk-stratify ARF. More research in this domain is needed.(13)  
348 Current Australian guidelines recommend 12 months of secondary prophylaxis after a  
349 diagnosis of possible ARF.(3) Our findings support this approach, since development of RHD  
350 more than 12 months after ‘possible ARF’ appears to be no more common than the

351 background population RHD risk, based on RHD population prevalence of 2% in 5-9 year old  
352 children undergoing echocardiographic screening, and 6.8% in 10-15 year olds, in a high-  
353 burden NT setting.(14)

354

355 Healthcare providers appear to be increasingly confident in accurately applying 'probable' and  
356 'possible' ARF diagnoses since 2013 when these were defined and introduced into the NT  
357 register. When total ARF diagnoses are captured, our data show that the increases over time  
358 chiefly represent improving detection of uncertain cases from 22/78 (28%) in 2013 to 98/193  
359 (51%) in 2018, with a smaller proportional increase in numbers of definite ARF (Fig 1). Efforts  
360 to improve detection have included promotion of accessible clinical practice guidelines (2, 3,  
361 15) and a diagnosis calculator available for smartphone use.(16)

362

363 The clinical manifestations of ARF we report are supported by previous NT data,(17) showing  
364 arthritis to be most common major criterion followed by carditis then chorea, with almost all  
365 additionally having fever.(18) Rheumatic carditis detected on echocardiogram is diagnostic of  
366 definite ARF and should not be classified as possible or probable ARF. Possible and probable  
367 cases noted to have echocardiographic valvar disease may have had known RHD and  
368 presented with an acute illness not meeting criteria for definite ARF. When a child with RHD  
369 presents with fever or elevated inflammatory markers, distinguishing ARF from other febrile  
370 conditions with underlying RHD can be difficult and may result in a 'possible' or 'probable' ARF  
371 diagnosis; the child is already prescribed penicillin prophylaxis but a new ARF diagnosis may  
372 alter the duration of prophylaxis depending on their age. Sydenham chorea is synonymous  
373 with ARF; once alternative causes of chorea have been excluded, a child with chorea  
374 (especially if from a high-risk setting such as the NT) receives a diagnosis of definite ARF.  
375 The possible and probable cases in this study noted to have chorea may, for instance, have  
376 had a transient movement disorder not clearly evident as Sydenham chorea. Definite ARF  
377 diagnoses require demonstration of recent streptococcal infection, except for when Sydenham

378 chorea is present, the onset of which might be very delayed.(3) The small number of definite  
379 cases who lacked evidence of streptococcal infection on serology or throat swab may have  
380 had chorea, may have had serological tests too early in disease without opportunity for  
381 convalescent serology to be done, or the clinician may have chosen to override the  
382 recommended diagnostic criteria.

383

384 The cumulative incidence risk of disease progression per year for those diagnosed with  
385 possible ARF stopped increasing at 11%, 4 years from initial diagnosis, and for those  
386 diagnosed with probable ARF at 14%, 3 years from initial diagnosis. In contrast, the cumulative  
387 incidence risk of disease progression after definite ARF continued to increase each year since  
388 initial diagnosis, from 9% at 1 year to 34% at 5.5 years from initial diagnosis (Table 3). While  
389 the trend of increasing risk of disease progression from initial diagnosis largely concurs with  
390 previous studies, the cumulative incidence risk of progression to RHD after definite ARF was  
391 lower in our study. For example, a study of 1997-2013 Northern Territory data found that the  
392 cumulative risk of progression from definite ARF to RHD increased from 27% at 1 year from  
393 initial diagnosis to 52% at 10 years since initial diagnosis,(9) and another study of 1997-2010  
394 data reported that the risk of progression from definite ARF to RHD was 35% at 1 year and  
395 61% at 10 years.(19) The lower rate of disease progression in our study may reflect exclusion  
396 of the most-severe ARF cases from cumulative incidence calculations, since they already had  
397 the outcome of interest (RHD) at baseline. Other explanations may include improving delivery  
398 of secondary prophylaxis which occurred during our study period(20), or greater clinical  
399 detection over time of more subtle ARF cases which are less likely to progress, which the  
400 increasing ARF detection rates reported here suggest.

401

402 Cox proportional hazards analysis demonstrated that those with more certain ARF were more  
403 likely to experience disease progression (compared to those with possible ARF). The risk of  
404 progression from no RHD to RHD was significantly higher if the initial diagnosis was definite

405 ARF compared to possible ARF ( $p < 0.001$  for both mild and moderate-severe RHD outcomes)  
406 (Table 6). Those who had only joint manifestations at initial diagnosis of ARF were 52% less  
407 likely to experience disease progression (compared to carditis and/or chorea). Joint-only  
408 manifestations, which may only fulfill criteria for possible or probable ARF, may in other  
409 settings be labelled as ‘post streptococcal reactive arthritis’, considered to be a separate entity  
410 from ARF.(21, 22) However, since 6.6% (37/560) of people still developed RHD in our series  
411 after initial joint-only presentations, we consider a diagnosis of ARF and provision of  
412 secondary prophylaxis to be safer in our context.

413

414 In this dataset, people with ARF who had greater penicillin adherence were also those with a  
415 higher risk of disease progression - but this association was not statistically significant (Table  
416 4). Furthermore, of the cases that progressed (and had adherence data), less than half (40/86;  
417 47%) were adherent to  $\geq 80\%$  of their BPG injections and adherence for both definite and  
418 probable ARF cases was shown to decline over time from initial diagnosis (Figure 3). These  
419 findings may be attributable to the association between disease severity and adherence.  
420 Previous research using the same NT register, but an earlier time period, identified that those  
421 with most severe disease (e.g. requiring surgery) were those who were subsequently most  
422 adherent, potentially attributable to higher-level health system supports implemented for these  
423 high-risk individuals, and greater patient understanding of the risks of non-adherence. (10)  
424 The same paper showed a clear protective effect of adherence on ARF outcomes when  
425 adherence prior to the event of interest was examined. Therefore, we conclude that adherence  
426 reduces ARF recurrences or RDH progression, but in this dataset, we were unable to  
427 demonstrate this relationship. Also, we used percent adherence which does not necessarily  
428 factor in ‘days at risk’(10); that is, the timing of dose administration (e.g. 13 BPG doses may  
429 be given in a 12 month period, but if there are gaps of greater than 28 days, then the patient  
430 will be at risk of ARF recurrence during those times).

431



432 Strengths of this study include that it is the first to include outcomes for possible and probable  
433 ARF cases and that ARF is notifiable in the NT and therefore ARF diagnoses are well captured  
434 and documented in the NT RHD Register. A limitation of this study is that a longer period of  
435 follow-up time may have captured more events. For example, disease progression from ARF  
436 to RHD is known to still occur at 10 years from initial diagnosis.(19) However, for possible and  
437 probable ARF, the risk of disease progression appeared to stabilise approximately 4 years  
438 from initial diagnosis (within the 5.5-year study timeframe). Another limitation is missed  
439 diagnoses of ARF; up to 75% of newly diagnosed cases of RHD in northern Australia have  
440 not been previously diagnosed with ARF.(3, 23) As noted, concurrent ARF and RHD  
441 diagnoses were excluded since they had a disease-free survival time of zero so could not be  
442 included in analysis of progression. Exclusion of these most severe ARF cases impacted  
443 sample size and statistical rigour, follow-up time and the ability to calculate median survival  
444 time, an important factor in the interpretation of survival data.(24)

445

## 446 **Conclusion**

447 This study provides much needed data about the likelihood of disease progression for children  
448 and young people given a diagnosis of possible and probable ARF. Children and their families  
449 can be reassured that possible ARF, probable ARF and ARF affecting the joints only, carry  
450 relatively good prognoses. These diagnoses are more consistent with post-streptococcal  
451 reactive arthritis than true ARF. However, secondary prophylaxis with penicillin is still of critical  
452 importance given the morbidity of recurrences and the small but present risk of progression to  
453 RHD. The data provide good news that clinicians appear to be detecting and reporting more  
454 cases of uncertain ARF over time, a critical step in avoiding missed opportunities for  
455 prevention.

456

## 457 Acknowledgements

458 This project was undertaken as part of the Master of Public Health at the University of  
459 Melbourne. The authors would like to thank Dr Jessica de Dassel, RHD Registry Data Analyst,  
460 and Dr Vicki Krause, Northern Territory Centre for Disease Control Director, for facilitating the  
461 data request and approval.

462

## 463 References

- 464 1. Katzenellenbogen, J. M., Bond-Smith D., Seth R. J., Dempsey K., Cannon J., Stacey  
465 I., et al. Contemporary Incidence and Prevalence of Rheumatic Fever and Rheumatic  
466 Heart Disease in Australia Using Linked Data: The Case for Policy Change. *Journal of*  
467 *the American Heart Association*. 2020;9(19):e016851.
- 468 2. Ralph, A. P., Currie B. J., Noonan S., Wade V. The 2020 Australian guideline for  
469 prevention, diagnosis and management of acute rheumatic fever and rheumatic heart  
470 disease. *Medical Journal of Australia*. 2021;214(5):220-227.
- 471 3. RHD Australia (ARF/RHD writing group). The 2020 Australian guideline for  
472 prevention, diagnosis and management of acute rheumatic fever and rheumatic  
473 heart disease (3rd edition). Australia2020.
- 474 4. Dajani, A. S., Ayoub E., Bierman F. Z., Bisno A. L., Denny F. W., Durack D. T., et al.  
475 Guidelines for the diagnosis of rheumatic fever: Jones Criteria, 1992 update. *Journal of*  
476 *the American Medical Association*. 1992;268(15):2069-2073.
- 477 5. WHO Study Group on Rheumatic Fever and Rheumatic Heart Disease. Rheumatic  
478 fever and rheumatic heart disease: report of a WHO expert consultation, Geneva, 20  
479 October - 1 November 2001. Geneva, Switzerland: World Health Organization; 2004.
- 480 6. Gewitz, M. H., Baltimore R. S., Tani L. Y., Sable C. A., Shulman S. T., Carapetis J., et  
481 al. Revision of the Jones Criteria for the diagnosis of acute rheumatic fever in the era  
482 of Doppler echocardiography: a scientific statement from the American Heart  
483 Association. *Circulation*. 2015;131(20):1806-1818.
- 484 7. Ralph, A., Jacups S., McGough K., McDonald M., Currie B. J. The Challenge of Acute  
485 Rheumatic Fever Diagnosis in a High-Incidence Population: A Prospective Study and  
486 Proposed Guidelines for Diagnosis in Australia's Northern Territory. *Heart, Lung and*  
487 *Circulation*. 2006;15(2):113-118.
- 488 8. Carapetis, J. R., Currie B. J., Mathews J. D. Cumulative incidence of rheumatic fever  
489 in an endemic region: a guide to the susceptibility of the population? *Epidemiology and*  
490 *Infection*. 2000;124(2):239-244.
- 491 9. He, V. Y. F., Condon J. R., Ralph A. P., Zhao Y., Roberts K., de Dassel J. L., et al.  
492 Long-term outcomes from acute rheumatic fever and rheumatic heart disease a data-  
493 linkage and survival analysis approach. *Circulation*. 2016;134(3):222-232.
- 494 10. de Dassel, J. L., de Klerk N., Carapetis J. R., Ralph A. P. How Many Doses Make a  
495 Difference? An Analysis of Secondary Prevention of Rheumatic Fever and Rheumatic  
496 Heart Disease. *Journal of the American Heart Association*. 2018;7(24):1-22.
- 497 11. Australia Bureau of Statistics. Australian demographic statistics Canberra, Australia:  
498 Australia Bureau of Statistics; 2018 [Available from:  
499 [https://www.ausstats.abs.gov.au/ausstats/subscriber.nsf/0/5E432E26B9EB0D28CA25](https://www.ausstats.abs.gov.au/ausstats/subscriber.nsf/0/5E432E26B9EB0D28CA25841E00129B45/$File/31010_dec%202018.pdf)  
500 [841E00129B45/\\$File/31010\\_dec%202018.pdf](https://www.ausstats.abs.gov.au/ausstats/subscriber.nsf/0/5E432E26B9EB0D28CA25841E00129B45/$File/31010_dec%202018.pdf).

- 501 12. Australian Bureau of Statistics. Estimated resident Aboriginal and Torres Strait  
502 Islander and Non-Indigenous population, States and Territories, Remoteness Areas -  
503 30 June 2016 Canberra, Australia: Australian Bureau of Statistics; 2016 [Available  
504 from:  
505 [https://www.abs.gov.au/AUSSTATS/abs@.nsf/DetailsPage/3238.0.55.001June%2020](https://www.abs.gov.au/AUSSTATS/abs@.nsf/DetailsPage/3238.0.55.001June%202016?OpenDocument)  
506 [16?OpenDocument](https://www.abs.gov.au/AUSSTATS/abs@.nsf/DetailsPage/3238.0.55.001June%202016?OpenDocument).  
507 13. Ralph, A. P., Yan J., Remenyi B., Mayo M., Webb R., Wilson N., et al. Searching for a  
508 technology-driven acute rheumatic fever test: The START study protocol. *BMJ Open*.  
509 2021;11(9):e053720.  
510 14. Francis, J. R., Fairhurst H., Hardefeldt H., Brown S., Ryan C., Brown K., et al.  
511 Hyperendemic rheumatic heart disease in a remote Australian town identified by  
512 echocardiographic screening. *Medical Journal of Australia*. 2020;213(3):118-123.  
513 15. Ralph, A. P., Currie B. J. Therapeutics for rheumatic fever and rheumatic heart  
514 disease. *Australian Prescriber*. 2022;45(4):104-112.  
515 16. Fisher, E., Currie B. J., Ralph A. P., James C., Mosca D. Evaluation of an ARF  
516 diagnosis calculator: a survey and content analysis. *BMC Medical Informatics and*  
517 *Decision Making*. 2022;22(1):77-88.  
518 17. Jack, S., Moreland N. J., Meagher J., Fittock M., Galloway Y., Ralph A. P.  
519 Streptococcal Serology in Acute Rheumatic Fever Patients: Findings From 2 High-  
520 income, High-burden Settings. *The Pediatric Infectious Disease Journal*. 2019;38(1):1-  
521 6.  
522 18. Carapetis, J. R., Beaton A., Cunningham M. W., Guilherme L., Karthikeyan C., Mayosi  
523 B. M., et al. Acute rheumatic fever and rheumatic heart disease. *Nature Reviews*.  
524 2016;2:1-24.  
525 19. Lawrence, J. G., Carapetis J. R., Griffiths K., Edwards K., Condon J. R. Acute  
526 rheumatic fever and rheumatic heart disease incidence and progression in the  
527 Northern Territory of Australia, 1997 to 2010. *Circulation*. 2013;128(5):492-501.  
528 20. Ralph, A. P., Read C., Johnston V., de Dassel J. L., Bycroft K., Mitchell A., et al.  
529 Improving delivery of secondary prophylaxis for rheumatic heart disease in remote  
530 Indigenous communities: study protocol for a stepped-wedge randomised trial. *Trials*.  
531 2016;17(1):51-63.  
532 21. van der Helm-van Mil, A. H. M. Acute rheumatic fever and poststreptococcal reactive  
533 arthritis reconsidered. *Current Opinion in Rheumatology*. 2010;22(4):437-442.  
534 22. Barash, J., Mashiach E., Navon-Elkan P., Berkun Y., Harel L., Tauber T., et al.  
535 Differentiation of post-streptococcal reactive arthritis from acute rheumatic fever.  
536 *Journal of Pediatrics*. 2008;153(5):696-699.  
537 23. Hardie, K., de Dassel J. L., Ralph A. P. RHD elimination: action needed beyond  
538 secondary prophylaxis. *Australian and New Zealand Journal of Public Health*.  
539 2020;44(5):427.  
540 24. Betensky, R. A. Measures of follow-up in time-to-event studies: Why provide them and  
541 what should they be? *Clinical Trials*. 2015;12(4):403-408.  
542
